# Supplementary material for: Proteomics Unveils Post-Mortem Changes in Beef Muscle Proteins and Provides Insight into Variations in Meat Quality Traits of Crossbred Young Steers and Heifers Raised in Feedlot
Source: MDPI journal article supplement (doi:10.3390/ijms232012259), 2022-10-14
Supplement: s1 [file s1]

## Supplementary data

**Table S1.** Chemical composition of the *Longissimus thoracis* muscle of immunocastrated F1 Montana-Nellore young heifers and steers feedlot finished.

| Variables             | Heifers | Steers | SEM  | P-value |
|-----------------------|---------|--------|------|---------|
| Moisture (%)          | 72.46   | 74.07  | 0.26 | <0.01   |
| Protein (%)           | 22.30   | 22.52  | 0.10 | 0.32    |
| Intramuscular fat (%) | 4.32    | 2.64   | 0.29 | 0.002   |
| Collagen (%)          | 1.22    | 1.20   | 0.02 | 0.77    |
